# Supplementary material
Source: ML conference proceedings conference paper supplement (https://openaccess.thecvf.com/content/ICCV2023/html/Ren_Decoupled_Iterative_Refinement_ICCV_2023_paper.html)
Supplement: Supplementary file 2 [file Ren_Decoupled_Iterative_Refinement_ICCV_2023_supplemental.zip]

Archive with 2 entries (2 files):
- 01444-supp.mp4
- 01444-supp.pdf
